# Supplementary material for: Synergistic effect of the reducing ability and hydrogen bonds of tested gases: highly orientational CdS dendrite sensors
Source: Royal Society of Chemistry journal article supplement (doi:10.1039/c3ta12938a), 2013-09-27
Supplement: c3ta12938a.pdf [file c3ta12938a.pdf]

## Supporting Information

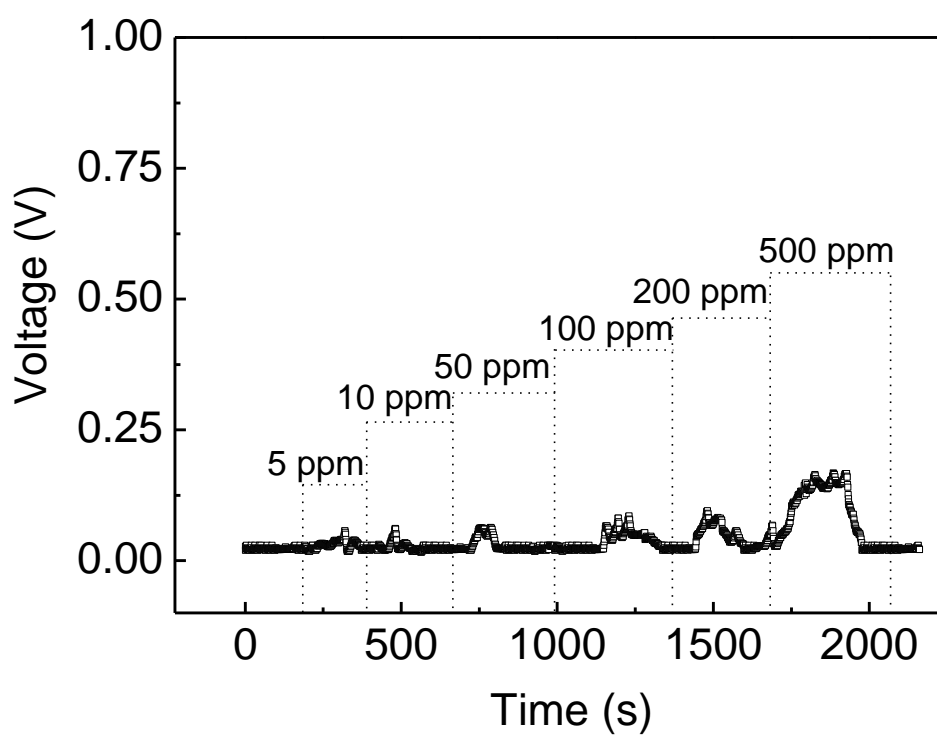

**Fig. S1** Dynamic response-recovery curves of the sensor to HCHO with different concentrations at 260 °C.

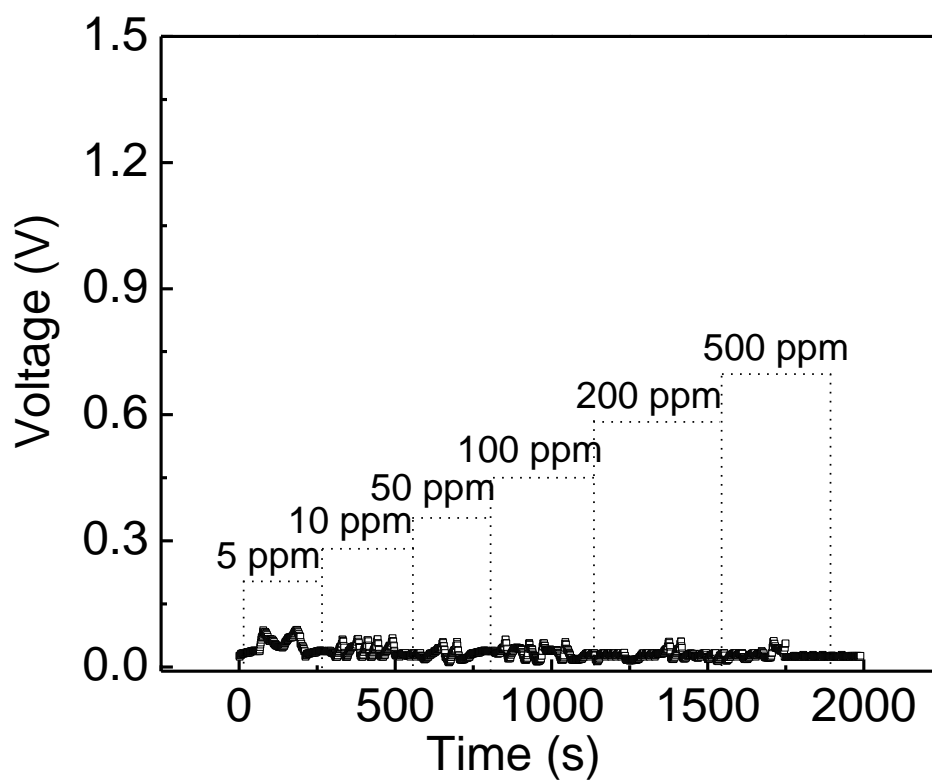

**Fig. S2** Dynamic response-recovery curves of the sensor to  $\text{NH}_3$  with different concentrations at  $260^\circ\text{C}$ .
